# Supplementary material for: The new wave of p75 neurotrophin receptor targeted therapies
Source: PubMed Central journal article supplement — Neural Regen Res. 2021 Jun 7;17(1):95–6. doi: 10.4103/1673-5374.314304 (PMC8451542; doi:10.4103/1673-5374.314304), 2021-06-07
Supplement: NRR-17-95_Suppl1.pdf [file NRR-17-95_Suppl1.pdf]

## OPEN PEER REVIEW REPORT 1

**Name of journal:** Neural Regeneration Research

**Manuscript NO:** NRR-D-21-00013

**Title:** The new wave of p75 neurotrophin receptor targeted therapies

**Reviewer's Name:** Kentaro Hatano

**Reviewer's country:** Japan

### COMMENTS TO AUTHORS

This paper describes p75 neurotrophin receptor targeted therapies. The manuscript is well written and worth publishing in NRR if following question were properly answered.

1. Author described in LM11A-31 section "LM11A-31 is a small molecule ligand designed to engage the p75NTR and downregulate degenerative signaling". I would like to know chemical structure or its molecular weight at least of the compound. Is it a p75NTR agonist?
2. Limited extent of description was dedicated to entitle other than LM11A-31 and p75ECD in Table 1 in the manuscript. Authors should include more thorough explanation in "other approaches" section.

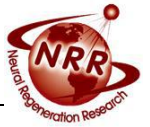

## OPEN PEER REVIEW REPORT 2

**Name of journal:** Neural Regeneration Research

**Manuscript NO:** NRR-D-21-00013

**Title:** The new wave of p75 neurotrophin receptor targeted therapies

**Reviewer's Name:** Ahmed Abdel-Zaher

**Reviewer's country:** EGYPT

### COMMENTS TO AUTHORS

- Language should be checked throughout the manuscript. References in the text should be corrected and rewritten in a correct form.
- The interaction between p75 NTR and Tau needs more information and explanation.
- What about the relationship between neurotrophins and neurodegenerative diseases other than AD.



### OPEN PEER REVIEW REPORT 3

**Name of journal:** Neural Regeneration Research

**Manuscript NO:** NRR-D-21-00013

**Title:** The new wave of p75 neurotrophin receptor targeted therapies

**Reviewer's Name:** Sanusi Mohammad Bello

**Reviewer's country:** SAUDI ARABIA

#### COMMENTS TO AUTHORS

The article is an important addition to the body of knowledge already existing in this area and a step in the right direction in the Neuro-repair. I congratulate the authors for taking time to do a thorough work in this article and helping the field of neural repair and neurology in general.
